# Supplementary material for: Cognitive Decline in Chronic Migraine with Nonsteroid Anti-inflammation Drug Overuse: A Cross-Sectional Study
Source: Hindawi journal article supplement (doi:10.1155/2019/7307198), 2019-05-06
Supplement: f1 [file 7307198.f1.pdf]

Supplementary Table: Risk factor analysis of cognitive decline (Univariate regression analysis)

|                       |            | Age               |              | Education         |              |
|-----------------------|------------|-------------------|--------------|-------------------|--------------|
|                       |            | <i>OR (95%CI)</i> | <i>P</i>     | <i>OR (95%CI)</i> | <i>P</i>     |
| Executive<br>function | ACE-R      | 1.02 (0.97-1.07)  | 0.388        | 0.41 (0.22-0.79)  | <b>0.007</b> |
|                       | Memory     | 1.01 (0.96-1.05)  | 0.810        | 0.55 (0.32-0.96)  | <b>0.036</b> |
|                       | Language   | 0.99 (0.95-1.04)  | 0.831        | 0.47 (0.27-0.82)  | <b>0.008</b> |
|                       | Visuospace | 1.02 (0.97-1.07)  | 0.518        | 0.33 (0.17-0.66)  | <b>0.002</b> |
|                       | TMT A      | 1.15 (1.08-1.22)  | <b>0.000</b> | 0.83 (0.49-1.42)  | 0.504        |
|                       | TMT B      | 1.07 (1.02-1.13)  | <b>0.010</b> | 0.50 (0.27-0.93)  | <b>0.029</b> |
|                       | DST        | 1.09 (1.03-1.15)  | <b>0.002</b> | 0.55 (0.31-1.01)  | 0.052        |

The low 20% performance of each cognitive evaluation was defined as cognitive decline.

**Abbreviation:** CM, chronic migraine; CM-MOH, chronic migraine with medication overuse headache; CMwoMOH, chronic migraine without medication overuse headache; MO, migraine without aura; OR, odds ratio; CI, confidence interval; ACE-R, Addenbrooke's cognitive examination test; TMT, Trail Making Test; DST, Digit Symbol Test.
